# Supplementary material
Source: ML conference proceedings conference paper supplement (https://openreview.net/forum?id=KLh86DknDj7)
Supplement: supplementary_material [file attachment]

## Sheet: Data Dictionary
Variable Names	Description	Monotonicity Constraint (with respect to probability of bad = 1)	Role
RiskPerformance	Paid as negotiated flag (12-36 Months). String of Good and Bad		target
ExternalRiskEstimate	Consolidated version of risk markers	Monotonically Decreasing	predictor
MSinceOldestTradeOpen	Months Since Oldest Trade Open	Monotonically Decreasing	predictor
MSinceMostRecentTradeOpen	Months Since Most Recent Trade Open	Monotonically Decreasing	predictor
AverageMInFile	Average Months in File	Monotonically Decreasing	predictor
NumSatisfactoryTrades	Number Satisfactory Trades	Monotonically Decreasing	predictor
NumTrades60Ever2DerogPubRec	Number Trades 60+ Ever	Monotonically Increasing	predictor
NumTrades90Ever2DerogPubRec	Number Trades 90+ Ever	Monotonically Increasing	predictor
PercentTradesNeverDelq	Percent Trades Never Delinquent	Monotonically Decreasing	predictor
MSinceMostRecentDelq	Months Since Most Recent Delinquency	Monotonically Decreasing	predictor
MaxDelq2PublicRecLast12M	Max Delq/Public Records Last 12 Months. See tab "MaxDelq" for each category	Values 0-7 are monotonically decreasing	predictor
MaxDelqEver	Max Delinquency Ever. See tab "MaxDelq" for each category	Values 2-8 are monotonically decreasing	predictor
NumTotalTrades	Number of Total Trades (total number of credit accounts)	No constraint	predictor
NumTradesOpeninLast12M	Number of Trades Open in Last 12 Months	Monotonically Increasing	predictor
PercentInstallTrades	Percent Installment Trades	No constraint	predictor
MSinceMostRecentInqexcl7days	Months Since Most Recent Inq excl 7days	Monotonically Decreasing	predictor
NumInqLast6M	Number of Inq Last 6 Months	Monotonically Increasing	predictor
NumInqLast6Mexcl7days	Number of Inq Last 6 Months excl 7days. Excluding the last 7 days removes inquiries that are likely due to price comparision shopping.	Monotonically Increasing	predictor
NetFractionRevolvingBurden	Net Fraction Revolving Burden. This is revolving balance divided by credit limit	Monotonically Increasing	predictor
NetFractionInstallBurden	Net Fraction Installment Burden. This is installment balance divided by original loan amount	Monotonically Increasing	predictor
NumRevolvingTradesWBalance	Number Revolving Trades with Balance	No constraint	predictor
NumInstallTradesWBalance	Number Installment Trades with Balance	No constraint	predictor
NumBank2NatlTradesWHighUtilization	Number Bank/Natl Trades w high utilization ratio	Monotonically Increasing	predictor
PercentTradesWBalance	Percent Trades with Balance	No constraint	predictor
*For a more detailed example of the monotonicity contraint, please see the "challenge rules" page

## Sheet: Max Delq
MaxDelq2PublicRecLast12M
value meaning
0	derogatory comment
1	120+ days delinquent
2	90 days delinquent
3	60 days delinquent
4	30 days delinquent
5, 6	unknown delinquency
7	current and never delinquent
8, 9	all other
MaxDelqEver
value meaning
1	No such value
2	derogatory comment
3	120+ days delinquent
4	90 days delinquent
5	60 days delinquent
6	30 days delinquent
7	unknown delinquency
8	current and never delinquent
9	all other

## Sheet: SpecialValues
-9 No Bureau Record or No Investigation
-8 No Usable/Valid Trades or Inquiries
-7 Condition not Met (e.g. No Inquiries, No Delinquencies)
